# Supplementary material
Source: MDPI journal article supplement (https://www.mdpi.com/2254-9625/11/2/44)
Supplement: s1 [file s1]

**Table S1.** Japanese word stimuli (transliteration).

| Word list A | Word list B | Word list C | Word list D |
|-------------|-------------|-------------|-------------|
| レヘ (rehe)   | ヌナ (nuna)   | ソヒ (sohi)   | ヌハ (nuha)   |
| ネメ (neme)   | ムヘ (muhe)   | ヘメ (heme)   | ラエ (rae)    |
| ルユ (ruyu)   | ワノ (wano)   | ロヌ (ronu)   | ツア (tsua)   |
| ツソ (tsuso)  | ヌツ (nutsu)  | ヌサ (nusa)   | ヌモ (numo)   |
| ネワ (newa)   | ホヌ (honu)   | ヘハ (heha)   | ムマ (muma)   |
| メナ (mena)   | ユチ (yuchi)  | メミ (memi)   | ラム (ramo)   |
| リイ (rii)    | ルヤ (ruya)   | ルニ (runi)   | レチ (rechi)  |
| レネ (rene)   | ワホ (waho)   | ロヘ (rohe)   | ケヘ (kehe)   |
| スヨ (suyo)   | テセ (tese)   | セホ (seho)   | トヌ (tonu)   |
| ニミ (nimi)   | ヌヘ (nuhe)   | ヌソ (nuso)   | ヌワ (nuwa)   |
| ネノ (nenno)  | ヘク (heku)   | ヒセ (hise)   | ヘフ (hefu)   |
| ホミ (homi)   | ムア (mua)    | ミヒ (mihi)   | ムト (muto)   |
| ムル (muru)   | ヨヤ (yoya)   | ユヌ (yunu)   | ラヤ (raya)   |
| ラル (raru)   | リフ (rifu)   | リテ (rite)   | ルセ (ruse)   |
| ルメ (rume)   | レハ (reha)   | ルワ (ruwa)   | ロナ (rona)   |
| ロヨ (royo)   | エニ (eni)    | ワモ (wamo)   | オヌ (onu)    |
| サヘ (sahe)   | スヘ (suhe)   | スニ (suni)   | セサ (sesa)   |
| セモ (semo)   | チテ (chite)  | ソユ (soyu)   | チネ (chine)  |
| ツサ (tsusa)  | ニヘ (nihe)   | トエ (toe)    | ヌア (nua)    |
| ヌホ (nuho)   | ネシ (neshi)  | ヌユ (nuyu)   | ノヒ (nohi)   |

**Table S2.** Haptic stimuli.

| number | material             | picture                                                                             | number | material        | picture                                                                              | number | material              | picture                                                                               | number | material             | picture                                                                               |
|--------|----------------------|-------------------------------------------------------------------------------------|--------|-----------------|--------------------------------------------------------------------------------------|--------|-----------------------|---------------------------------------------------------------------------------------|--------|----------------------|---------------------------------------------------------------------------------------|
| 1      | Woolen blanket       |    | 6      | Gauze           |    | 11     | Foam board            |    | 16     | Hard gauze           |    |
| 2      | Soft mat             |    | 7      | Fabric          |    | 12     | Plastic cutting board |    | 17     | Towel                |    |
| 3      | Wooden cutting board |    | 8      | Sand paper      |    | 13     | Sand paper            |    | 18     | Hard mat             |    |
| 4      | Foam board           |   | 9      | Rubber          |   | 14     | Hard mat              |   | 19     | Vinyl sheet flooring |   |
| 5      | Foam board           |  | 10     | Artificial turf |  | 15     | Filtration fabric     |  | 20     | Aluminum             |  |

Note: Although same category names are included in Table S2, the materials of haptic stimuli are differential among those category names.
